# Supplementary material for: Identification of regulatory targets for the bacterial Nus factor complex
Source: PubMed Central journal article supplement (PMC5725501; doi:10.1038/s41467-017-02124-9), 2017-12-11
Supplement: 41467_2017_2124_MOESM1_ESM.pdf [file 41467_2017_2124_MOESM1_ESM.pdf]

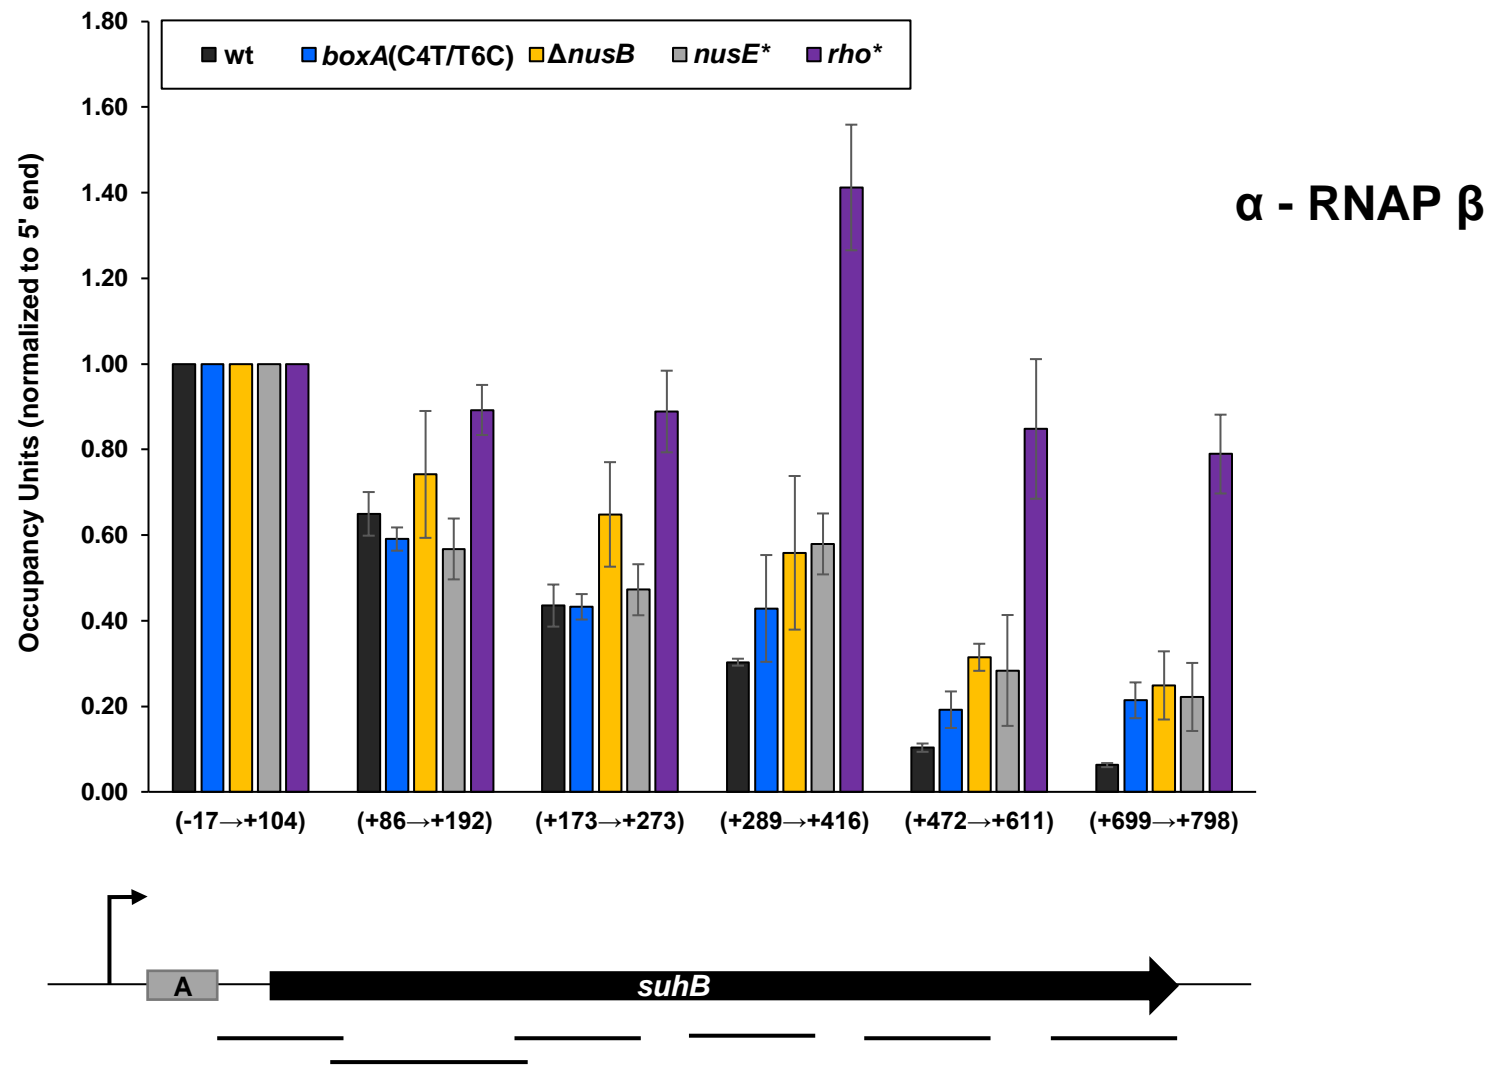

**Supplementary Figure 1. Transcription termination within *suhB* is dependent on Rho and Nus factors.** This is an extended version of Fig. 1. RNAP ( $\beta$ ) enrichment at regions across *suhB* was measured using ChIP-qPCR in wt MG1655, *boxA*(C4T/T6C),  $\Delta$ *nusB*, *nusE*(A12E) or *rho*(R66S) mutant strains. All values are normalised to the signal at the 5' end of *suhB* gene. *x*-axis labels indicate qPCR amplicon position relative to the *suhB* ORF. Error bars represent  $\pm 1$  standard deviation from the mean ( $n=3$ ). A schematic depicting *suhB* gene, the transcription start site (bent arrow) and *boxA* (grey rectangle) is shown below the graph. The six horizontal black lines indicate the position of the PCR amplicon.



```

Providencia_stuartii_MRSN_2154_uid162193      --A-AAAAGCCC-----
Erwinia_amylovora_ATCC_49946_uid46943         --GACGATATTACCT-----
Proteus_mirabilis_HI4320_uid61599             --A-AGATAACC-----
Edwardsiella_ictaluri_93_146_uid59403         --A-AGATTCCC-----
Pantoea_ananatis_AJ13355_uid162073           --G-AGATACCG-----
Klebsiella_oxytoca_E718_uid170256            --G-AGATACCG-----
Enterobacter_638_uid58727                     --G-AGTAACCG-----
Cronobacter_sakazakii_ATCC_BAA_894_uid58145   --G-AGAAACCTGATGCATCCG
Citrobacter_koseri_ATCC_BAA_895_uid58143      --G-AGAGATCG-ATGCATCCG
Escherichia_coli_K_12_substr_MG1655_uid57779  --G-AGAGACCG-----
Shigella_flexneri_2a_2457T_uid57991          --G-AGAGACCG-----
Salmonella_enterica_serovar_Typhimurium_14028S_uid86059
Dickeya_dadantii_3937_uid52537               --A-CGATACC-----
Pectobacterium_atrosepticum_SCRI1043_uid57957
Sodalis_glossinidius_morsitans_uid58553      ACA-CGATATCC-----
Photorhabdus_luminescens_laumondii_TTO1_uid61593
Xenorhabdus_nematophila_ATCC_19061_uid49133   --A-AGATATCCC-----
Rahnella_aquatilis_CIP_78_65__ATCC_33071_uid86855
Serratia_AS12_uid67315                       --A-AGATATCC-----
Yersinia_pestis_KIM_10_uid57875              --A-AGATACCC-----

```

**Supplementary Figure 2. MUSCLE (v3.8) Alignment (CLUSTAL Format) of 100 bp regions upstream of *suhB* homologues in *Enterobacteriaceae* species.** Species names are indicated to the left of the alignment. Asterisks indicate positions that are 100% conserved across the 20 species.

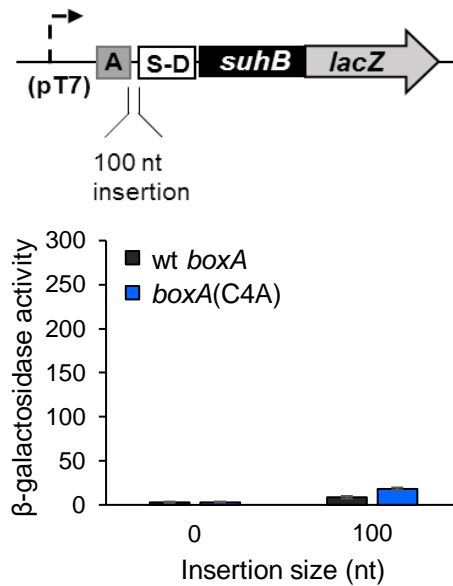

**Supplementary Figure 3. The effect of 100 nt insertion between *boxA* and the S-D on *suhB-lacZ* expression levels when the native promoter is absent.**  $\beta$ -galactosidase assay of wild-type (“wt *boxA*”; dark grey bars) and *boxA* mutant (*boxA*(C4A); blue bars) *suhB* translational fusion to *lacZ*. The length of inserted sequence is indicated on the *x*-axis. The native *suhB* promoter was replaced by a T7 promoter (“pT7”; see schematic above the graph). Additionally, bacterial cells carried an empty pBAD18 vector (T7 RNAP was not supplied in this assay). Cells were grown in the presence of 0.2% arabinose. Error bars represent  $\pm 1$  standard deviation from the mean ( $n=3$ ). Note that the  $\beta$ -galactosidase activity from the translational fusion construct shown here is substantially lower than the activity from the equivalent transcriptional fusion construct with a native *suhB* promoter (Fig. 5, far right). Moreover,  $\beta$ -galactosidase activity from a wild-type *suhB-lacZ* translational fusion construct is ~8-fold higher than the activity from the equivalent transcriptional fusion construct (607 $\pm$ 8 and 78 $\pm$ 3  $\beta$ -galactosidase activity units, respectively). We conclude that the majority of  $\beta$ -galactosidase activity for the *suhB-lacZ* transcriptional fusion with a native promoter and a 100 nt insertion (Fig. 5, far right) is due to transcription from the native promoter.

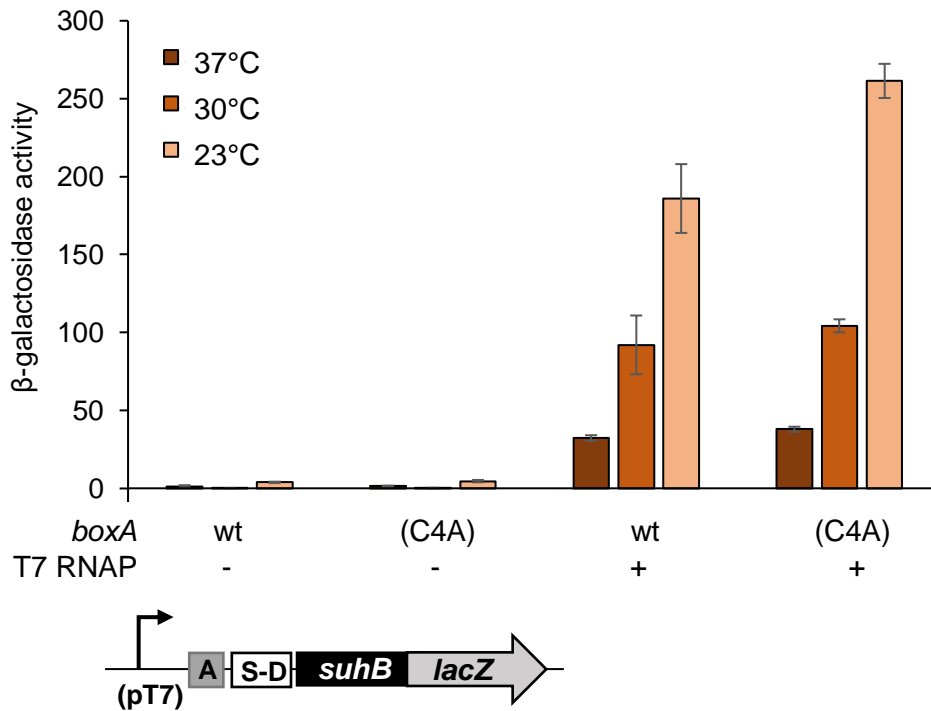

**Supplementary Figure 4. *suhB* expression by T7 RNAP abolishes BoxA-mediated translational repression.**  $\beta$ -galactosidase assay of wild-type (“wt”) and *boxA* mutant (“C4A”) *suhB* translational fusions to *lacZ*. The native *suhB* promoter was replaced by a T7 promoter (“pT7”; see schematic below the graph). Additionally, bacterial cells carried a plasmid with either an empty pBAD18 vector or pBAD18 expressing T7 RNAP (as indicated on the *x*-axis).  $\beta$ -galactosidase activity was measured for cells grown in the presence of 0.2% arabinose to induce T7 RNAP expression at 37 °C, 30 °C or 23 °C as indicated in the legend. Error bars represent  $\pm 1$  standard deviation from the mean (n=3).

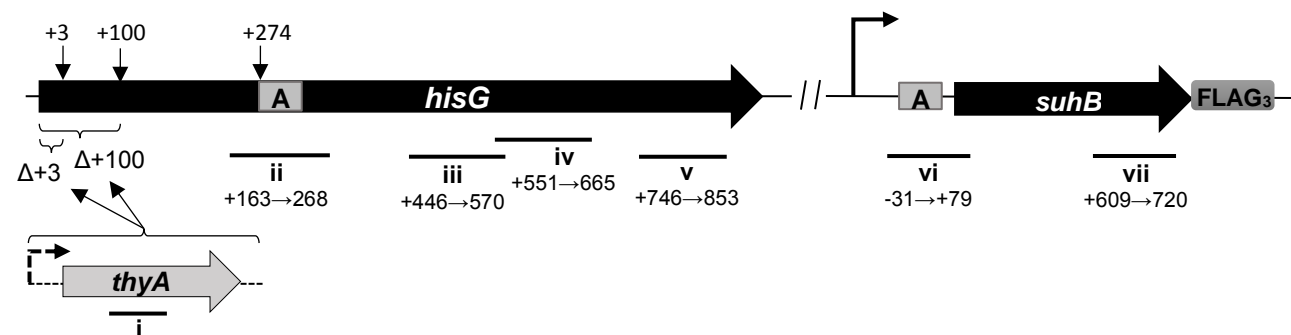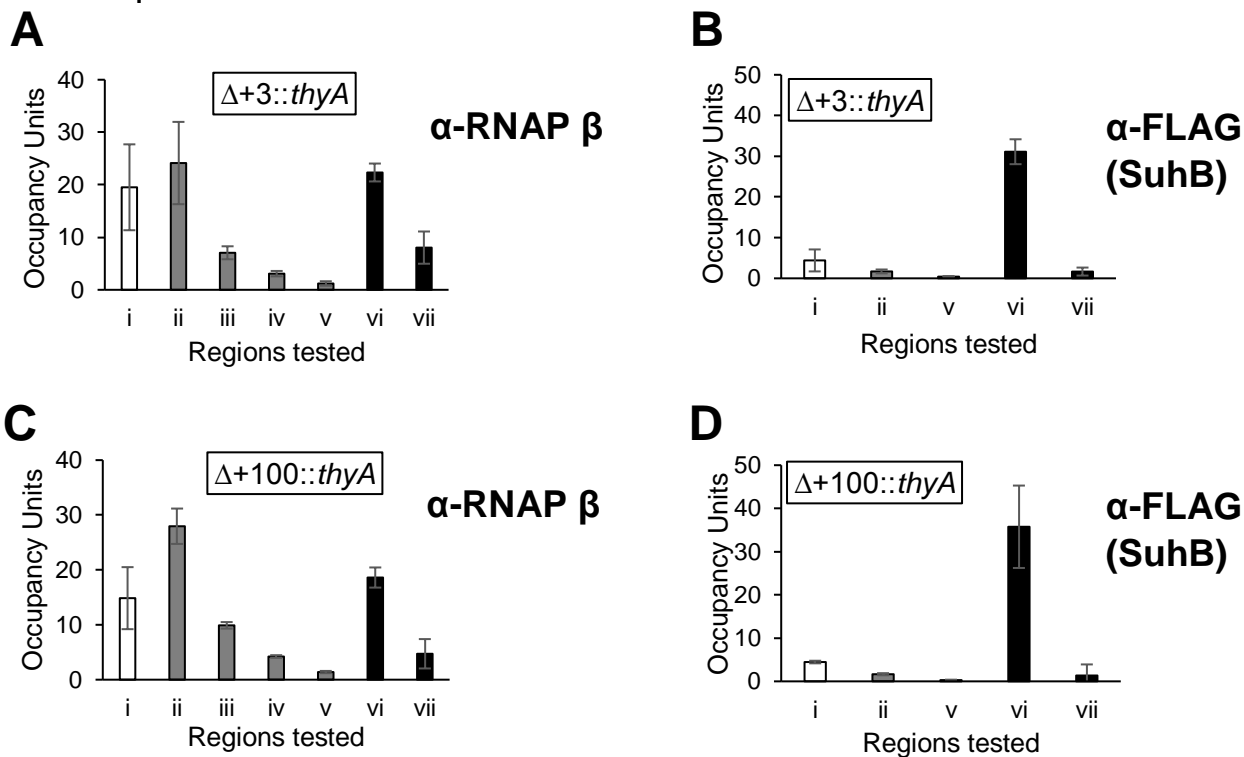

**Supplementary Figure 5. Evidence for and against functional BoxA elements upstream of *suhB* and inside *hisG* gene in *S. Typhimurium*, respectively.** Previous studies reported a functional BoxA within the *S. Typhimurium hisG* mRNA<sup>1,2</sup>. This putative BoxA was reported as being functional only when *hisG* translation was abolished by mutation of the gene. Hence, we interrupted *hisG* upstream of the putative *boxA* by inserting the *thyA* gene 3 bp or 100 bp downstream of the start codon. RNAP ( $\beta$ ) (**A and C**) and SuhB-FLAG (**B and D**) association with *thyA*, *hisG* and *suhB* was measured using ChIP-qPCR in a derivative of *S. Typhimurium* strain 14028s in which *thyA* was deleted at its native locus, and *hisG* was disrupted by insertion of *thyA*, replacing the first 3 (**A and B**) or 100 (**C and D**) nucleotides of *hisG*. *x*-axis labels indicate the qPCR amplicon used, with numbers corresponding to the schematics above the graphs. Error bars represent  $\pm 1$  standard deviation from the mean ( $n=3$ ). In the schematic, the *suhB boxA* and the putative *hisG boxA* are indicated by grey rectangles. Numbers above the arrows represent nucleotide positions relative to the *hisG* gene start (without *thyA* insertion). Horizontal black lines indicate the positions of PCR amplicons.

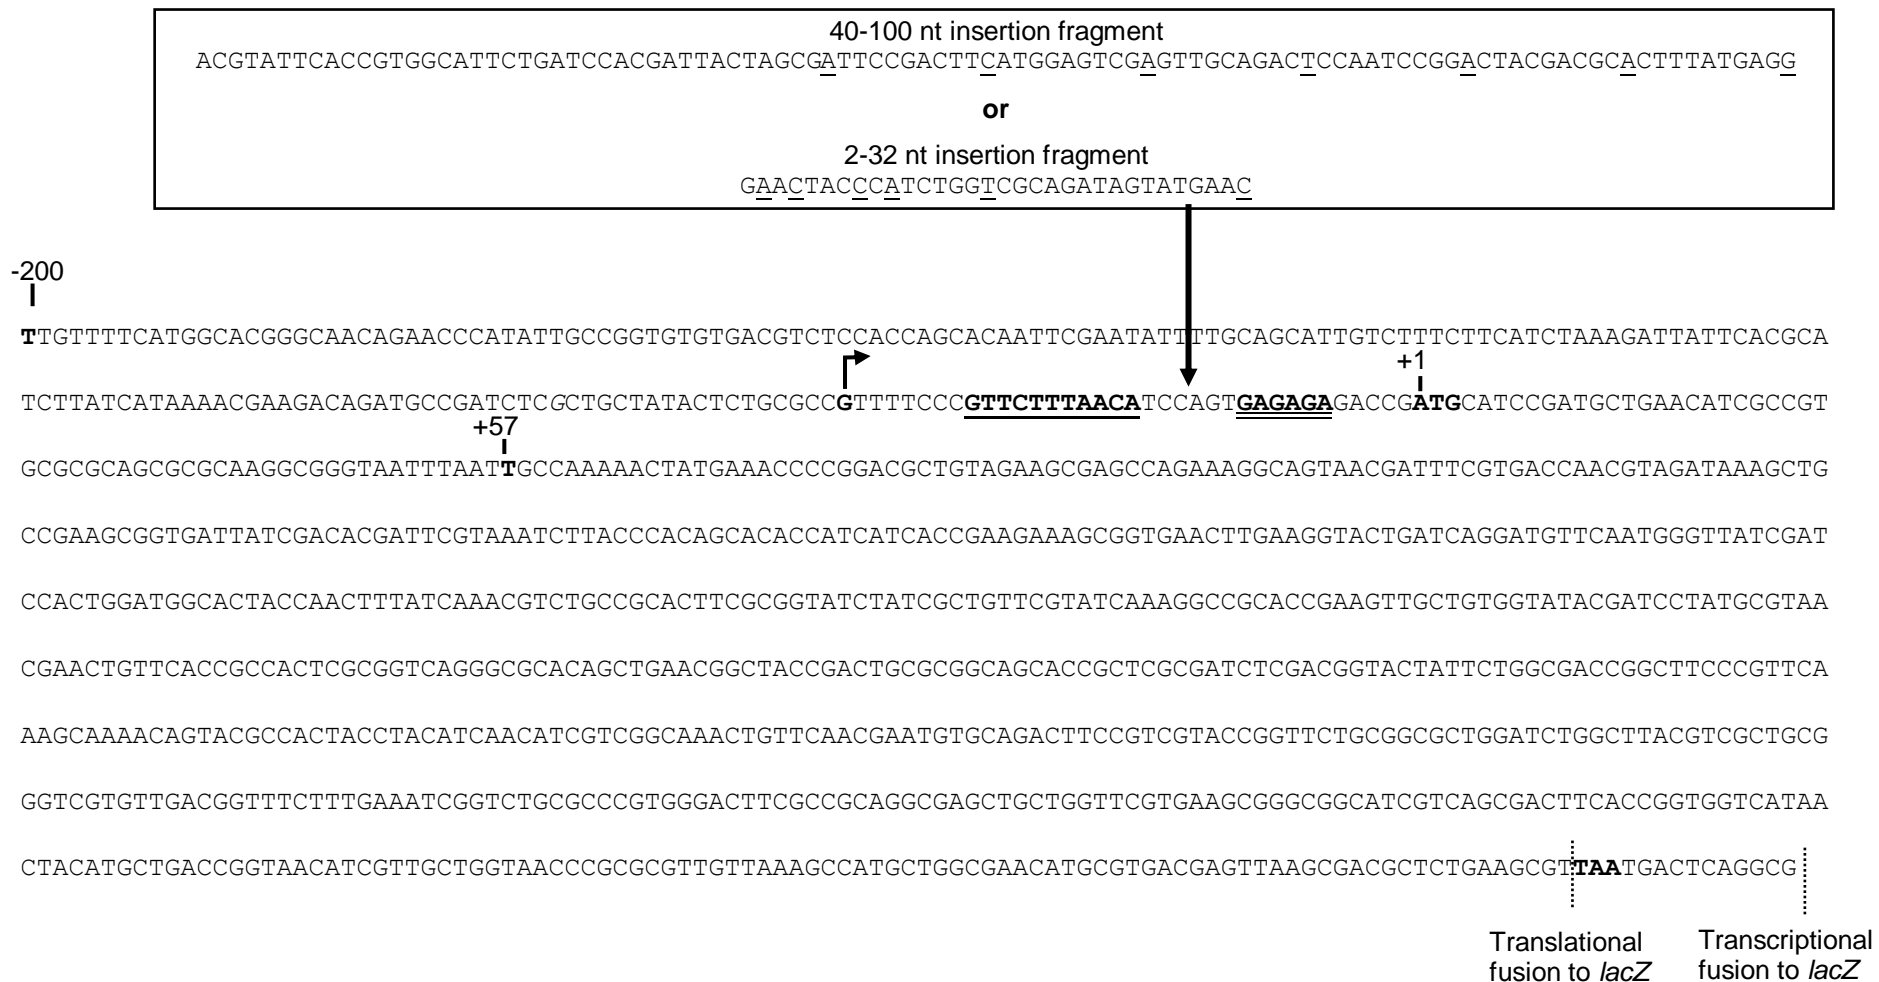

**Supplementary Figure 6. *subB* gene sequence used in *lacZ* fusion constructs.** Relevant features used in this work are indicated: transcription start site (bent arrow), *boxA* sequence (single underline), S-D (double underline), start (“ATG”) and stop (“TAA”) codons (bold). The non-coding DNA sequence inserted between *BoxA* and S-D (Fig. 5) is shown in the box above, and the arrow points to the position of the insertion. Underlined nucleotides indicate the 3’ ends of various insertions and correspond to the insertion size labelled in Fig. 5. *subB* sequence used in *lacZ* fusions in Fig. 3A-B included from position -200 to the end of the gene, as indicated by dashed lines. The short *subB-lacZ* transcriptional fusion from Fig. 4B included *subB* sequence up to position +57, and an in-frame stop codon immediately after the gene fragment.

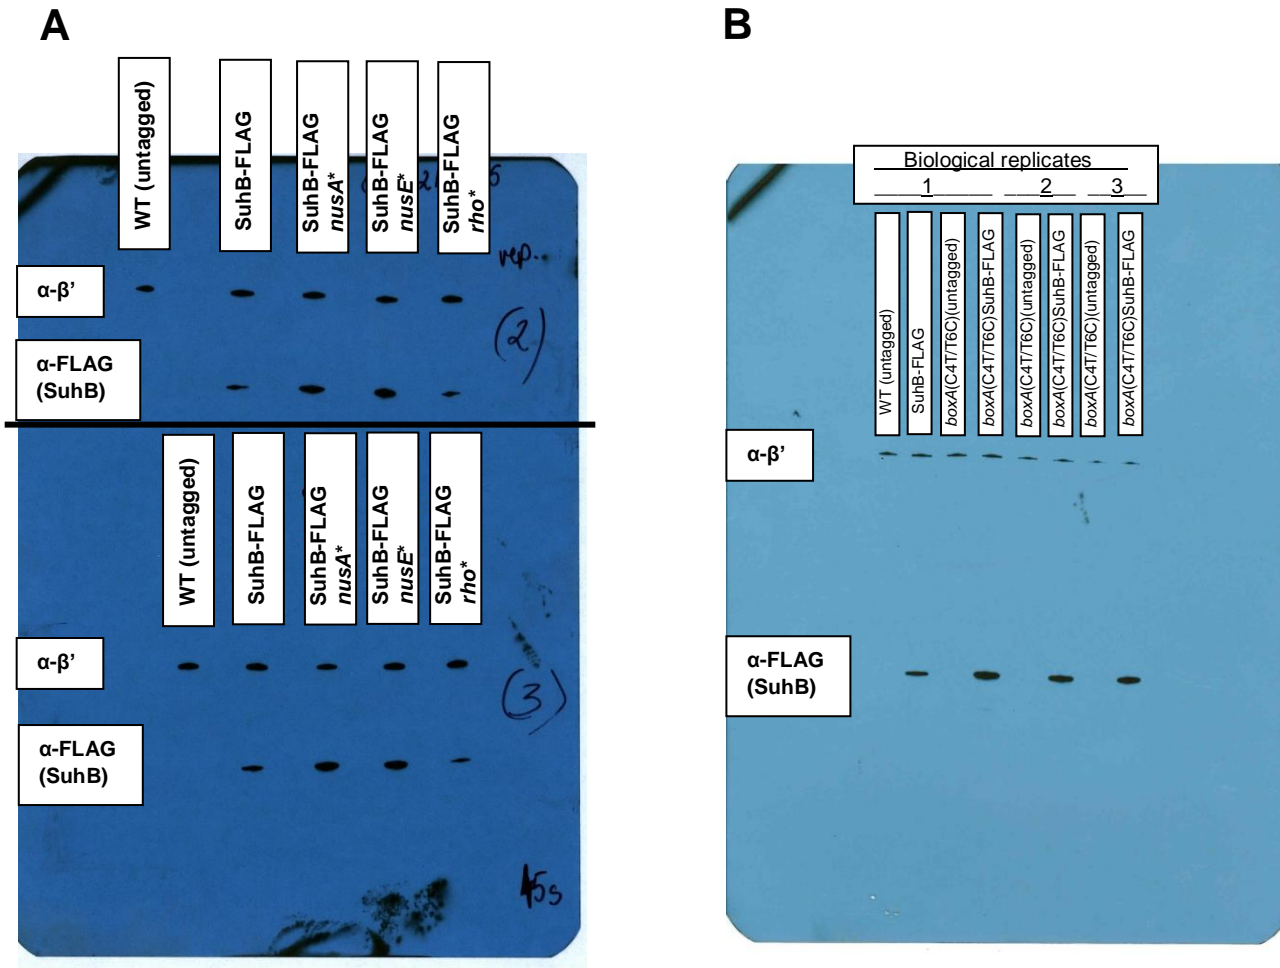

**Supplementary Figure 7. Unprocessed western blot images from Fig. 3D-C.** Western blots showing SuhB-FLAG protein levels in wild-type cells, *nusAcs10*, *nusE*(A12E), *rho*(R66S) (**A**), and *boxA*(C4T/T6C) mutants (**B**). SuhB-FLAG was probed with  $\alpha$ -FLAG antibody; RNAP  $\beta$ ' was probed as a loading control. Blots from the same SDS-PAGE gel were processed in parallel, see 'Methods' for details.



**Supplementary Table 1. List of *nusB*, *nusE* and *nusG* mutants isolated in the genetic selection for factors that repress *suhB*.**

|             | <b>Nucleotide Change<sup>a</sup></b> | <b>Amino Acid Change<sup>a</sup></b> | <b>Other</b>                     |
|-------------|--------------------------------------|--------------------------------------|----------------------------------|
| <i>nusB</i> | C22A                                 | R8S                                  | N/A                              |
|             | C26A                                 | A9D                                  | N/A                              |
|             | T52A                                 | Y18N                                 | N/A                              |
|             | T52G                                 | Y18D                                 | N/A                              |
|             | A53C                                 | Y18S                                 | N/A                              |
|             | A53G                                 | Y18C                                 | N/A                              |
|             | C320A                                | A107E                                | N/A                              |
|             | A322T                                | I108F                                | N/A                              |
|             | G344A                                | G115D                                | N/A                              |
|             | T377A                                | V126E                                | N/A                              |
|             | T9G                                  | Silent                               | N/A                              |
|             | T18G                                 | Silent                               | N/A                              |
|             | C21G                                 | Silent                               | N/A                              |
|             | N/A                                  | N/A                                  | IS3 insertion after position 140 |
| <i>nusE</i> | A7C                                  | N3H                                  | N/A                              |
|             | C35A*                                | A12E*                                | N/A                              |
|             | T53A*                                | I18N*                                | N/A                              |
|             | A56T                                 | D19V                                 | N/A                              |
|             | C295A                                | Q99K                                 | N/A                              |
|             | G297T*                               | Q99H*                                | N/A                              |
|             | A15G                                 | Silent                               | N/A                              |
|             | G294A                                | Silent                               | N/A                              |
|             | C300A                                | Silent                               | N/A                              |
|             | C-79T                                | N/A                                  | N/A                              |
|             | A-12G                                | N/A                                  | N/A                              |
| <i>nusG</i> | N/A                                  | N/A                                  | Duplication of -23 to -2         |
|             | ΔA515                                | N/A                                  | N/A                              |
|             | N/A                                  | N/A                                  | IS1 insertion after position 534 |

<sup>a</sup> mutations marked with an asterisk were isolated independently on two occasions

**Supplementary Table 2. A list of relevant *boxA* sequences from *E. coli* and related bacteria.**

| Species                                             | Gene                   | <i>boxA</i> sequence and nt positions <sup>a</sup> |   |   |          |   |          |   |   |   |    |    |
|-----------------------------------------------------|------------------------|----------------------------------------------------|---|---|----------|---|----------|---|---|---|----|----|
|                                                     |                        | 1                                                  | 2 | 3 | 4        | 5 | 6        | 7 | 8 | 9 | 10 | 11 |
| <i>E. coli, S. enterica</i><br>and <i>C. koseri</i> | rRNA                   | G                                                  | C | U | C        | U | U        | U | A | A | C  | A  |
|                                                     | <i>suhB</i>            | G                                                  | U | U | C        | U | U        | U | A | A | C  | A  |
|                                                     | <i>suhB</i> (C4A)      | G                                                  | U | U | <b>A</b> | U | U        | U | A | A | C  | A  |
|                                                     | <i>suhB</i> (C4T/T6C)  | G                                                  | U | U | <b>U</b> | U | <b>C</b> | U | A | A | C  | A  |
| <i>C. koseri</i>                                    | <i>CKO_00699</i>       | G                                                  | C | U | C        | U | U        | U | A | A | C  | A  |
|                                                     | <i>CKO_00699</i> (C4A) | G                                                  | C | U | <b>A</b> | U | U        | U | A | A | C  | A  |
| <i>S. enterica</i>                                  | <i>hisG</i>            | G                                                  | C | U | <u>A</u> | U | U        | U | A | A | C  | C  |

<sup>a</sup> Nucleotide positions are numbered 1-11 above the sequences. BoxA from rRNA is considered a consensus. A critical nucleotide important for Nus factor association is “C” at position 4<sup>3,4</sup>, and the mismatch in the *S. enterica* putative *hisG* BoxA sequence is underlined. *suhB* and *CKO\_00699 boxA* mutations used in this study are in bold.

**Supplementary Table 3. List of bacterial strains and plasmids used in this study.**

| Name                 | Description                                                                                                                                                                                                                                                                                                                        | Source     |
|----------------------|------------------------------------------------------------------------------------------------------------------------------------------------------------------------------------------------------------------------------------------------------------------------------------------------------------------------------------|------------|
| <b>Strains</b>       |                                                                                                                                                                                                                                                                                                                                    |            |
| MG1655               | MG1655 (F- $\lambda$ - $\Delta$ ilvG <i>rfb</i> -50 <i>rph</i> -1)                                                                                                                                                                                                                                                                 | 5          |
| EPI300               | F <sup>-</sup> <i>mcrA</i> $\Delta$ ( <i>mrr</i> - <i>hsdRMS</i> - <i>mcrBC</i> ) $\Phi$ 80 <i>dlacZ</i> $\Delta$ M15 $\Delta$ <i>lacX74</i> <i>recA1</i> <i>endA1</i> <i>araD139</i> $\Delta$ ( <i>ara</i> , <i>leu</i> )7697 <i>galU</i> <i>galK</i> $\lambda$ - <i>rpsL</i> ( <i>StrR</i> ) <i>nupG</i> <i>trfA</i> <i>dhfr</i> | Epicentre  |
| AMD054               | MG1655 $\Delta$ <i>lacZ</i>                                                                                                                                                                                                                                                                                                        | 6          |
| JW023                | MG1655 $\Delta$ <i>lacZ</i> $\Delta$ <i>nusB::thyA</i>                                                                                                                                                                                                                                                                             | This study |
| GB003                | MG1655 $\Delta$ <i>lacZ</i> <i>nusE</i> (A12E)                                                                                                                                                                                                                                                                                     | This study |
| GB004                | MG1655 $\Delta$ <i>lacZ</i> <i>rho</i> (R66S)                                                                                                                                                                                                                                                                                      | This study |
| VS066                | MG1655 <i>suhB</i> -FLAG                                                                                                                                                                                                                                                                                                           | 7          |
| GB006                | MG1655 <i>nusE</i> (A12E) <i>suhB</i> -FLAG                                                                                                                                                                                                                                                                                        | This study |
| GB007                | MG1655 <i>rho</i> (R66S) <i>suhB</i> -FLAG                                                                                                                                                                                                                                                                                         | This study |
| GB023                | MG1655 <i>suhB</i> ( <i>boxA</i> (C4T/T6C))                                                                                                                                                                                                                                                                                        | This study |
| GB024                | MG1655 <i>suhB</i> ( <i>boxA</i> (C4T/T6C))-FLAG                                                                                                                                                                                                                                                                                   | This study |
| GB036                | 14028S $\Delta$ +3( <i>hisG</i> ):: <i>thyA</i> <i>suhB</i> -FLAG                                                                                                                                                                                                                                                                  | This study |
| GB037                | 14028S $\Delta$ +100( <i>hisG</i> ):: <i>thyA</i> <i>suhB</i> -FLAG                                                                                                                                                                                                                                                                | This study |
| <b>Plasmids</b>      |                                                                                                                                                                                                                                                                                                                                    |            |
| pAMD-BA- <i>lacZ</i> | Single-copy <i>lacZ</i> expression vector                                                                                                                                                                                                                                                                                          | 6          |
| pKD46                | Encodes $\lambda$ recombinase system                                                                                                                                                                                                                                                                                               | 8          |
| pJTW067              | <i>suhB</i> (T607C) +200nt upstream transcriptional fusion to <i>lacZ</i>                                                                                                                                                                                                                                                          | This study |
| pGB1                 | <i>suhB</i> +200nt upstream transcriptional fusion to <i>lacZ</i>                                                                                                                                                                                                                                                                  | This study |
| pGB2                 | <i>suhB</i> ( <i>boxA</i> (C4A)) +200nt upstream transcriptional fusion to <i>lacZ</i>                                                                                                                                                                                                                                             | This study |
| pGB67                | <i>suhB</i> ( <i>boxA</i> (C4T/T6C)) +200nt upstream transcriptional fusion to <i>lacZ</i>                                                                                                                                                                                                                                         | This study |
| pGB3                 | <i>suhB</i> +200nt upstream translational fusion to <i>lacZ</i>                                                                                                                                                                                                                                                                    | This study |
| pGB4                 | <i>suhB</i> ( <i>boxA</i> (C4A)) +200nt upstream translational fusion to <i>lacZ</i>                                                                                                                                                                                                                                               | This study |
| pGB68                | <i>suhB</i> ( <i>boxA</i> (C4T/T6C)) +200nt upstream translational fusion to <i>lacZ</i>                                                                                                                                                                                                                                           | This study |
| pGB7                 | <i>boxA</i> -2nt-SD <i>suhB</i> +200nt upstream transcriptional fusion to <i>lacZ</i>                                                                                                                                                                                                                                              | This study |
| pGB8                 | <i>boxA</i> -4nt-SD <i>suhB</i> +200nt upstream transcriptional fusion to <i>lacZ</i>                                                                                                                                                                                                                                              | This study |
| pGB9                 | <i>boxA</i> -8nt-SD <i>suhB</i> +200nt upstream transcriptional fusion to <i>lacZ</i>                                                                                                                                                                                                                                              | This study |
| pGB10                | <i>boxA</i> -10nt-SD <i>suhB</i> +200nt upstream transcriptional fusion to <i>lacZ</i>                                                                                                                                                                                                                                             | This study |
| pGB11                | <i>boxA</i> -16nt-SD <i>suhB</i> +200nt upstream transcriptional fusion to <i>lacZ</i>                                                                                                                                                                                                                                             | This study |

|        |                                                                                                       |              |
|--------|-------------------------------------------------------------------------------------------------------|--------------|
| pGB12  | <i>boxA</i> -32nt-SD <i>suhB</i> +200nt upstream transcriptional fusion to <i>lacZ</i>                | This study   |
| pGB13  | <i>boxA</i> -40nt-SD <i>suhB</i> +200nt upstream transcriptional fusion to <i>lacZ</i>                | This study   |
| pGB14  | <i>boxA</i> -50nt-SD <i>suhB</i> +200nt upstream transcriptional fusion to <i>lacZ</i>                | This study   |
| pGB15  | <i>boxA</i> -60nt-SD <i>suhB</i> +200nt upstream transcriptional fusion to <i>lacZ</i>                | This study   |
| pGB16  | <i>boxA</i> -70nt-SD <i>suhB</i> +200nt upstream transcriptional fusion to <i>lacZ</i>                | This study   |
| pGB17  | <i>boxA</i> -80nt-SD <i>suhB</i> +200nt upstream transcriptional fusion to <i>lacZ</i>                | This study   |
| pGB18  | <i>boxA</i> -90nt-SD <i>suhB</i> +200nt upstream transcriptional fusion to <i>lacZ</i>                | This study   |
| pGB19  | <i>boxA</i> -100nt-SD <i>suhB</i> +200nt upstream transcriptional fusion to <i>lacZ</i>               | This study   |
| pGB23  | <i>boxA</i> (C4A)-2nt-SD <i>suhB</i> +200nt upstream transcriptional fusion to <i>lacZ</i>            | This study   |
| pGB24  | <i>boxA</i> (C4A)-4nt-SD <i>suhB</i> +200nt upstream transcriptional fusion to <i>lacZ</i>            | This study   |
| pGB25  | <i>boxA</i> (C4A)-8nt-SD <i>suhB</i> +200nt upstream transcriptional fusion to <i>lacZ</i>            | This study   |
| pGB26  | <i>boxA</i> (C4A)-10nt-SD <i>suhB</i> transcriptional fusion to <i>lacZ</i>                           | This study   |
| pGB27  | <i>boxA</i> (C4A)-16nt-SD <i>suhB</i> transcriptional fusion to <i>lacZ</i>                           | This study   |
| pGB29  | <i>boxA</i> (C4A)-32nt-SD <i>suhB</i> transcriptional fusion to <i>lacZ</i>                           | This study   |
| pGB30  | <i>boxA</i> (C4A)-40nt-SD <i>suhB</i> +200nt upstream transcriptional fusion to <i>lacZ</i>           | This study   |
| pGB31  | <i>boxA</i> (C4A)-50nt-SD <i>suhB</i> +200nt upstream transcriptional fusion to <i>lacZ</i>           | This study   |
| pGB32  | <i>boxA</i> (C4A)-60nt-SD <i>suhB</i> +200nt upstream transcriptional fusion to <i>lacZ</i>           | This study   |
| pGB33  | <i>boxA</i> (C4A)-70nt-SD <i>suhB</i> +200nt upstream transcriptional fusion to <i>lacZ</i>           | This study   |
| pGB34  | <i>boxA</i> (C4A)-80nt-SD <i>suhB</i> +200nt upstream transcriptional fusion to <i>lacZ</i>           | This study   |
| pGB35  | <i>boxA</i> (C4A)-90nt-SD <i>suhB</i> +200nt upstream transcriptional fusion to <i>lacZ</i>           | This study   |
| pGB36  | <i>boxA</i> (C4A)-100nt-SD <i>suhB</i> +200nt upstream transcriptional fusion to <i>lacZ</i>          | This study   |
| pBAD18 | Contains arabinose inducible promoter                                                                 | <sup>9</sup> |
| pGB115 | pBAD18:T7RNAP                                                                                         | This study   |
| pGB84  | pT7- <i>suhB</i> translational fusion to <i>lacZ</i>                                                  | This study   |
| pGB83  | pT7- <i>boxA</i> (C4A)- <i>suhB</i> translational fusion to <i>lacZ</i>                               | This study   |
| pGB94  | pT7- <i>boxA</i> -100nt- <i>suhB</i> translational fusion to <i>lacZ</i>                              | This study   |
| pGB95  | pT7- <i>boxA</i> (C4A)-100nt- <i>suhB</i> translational fusion to <i>lacZ</i>                         | This study   |
| pGB109 | pHigh-CKO_00699(R82A) transcriptional fusion to <i>lacZ</i>                                           | This study   |
| pGB110 | pHigh-CKO_00699(R82A)- <i>boxA</i> (C4A) transcriptional fusion to <i>lacZ</i>                        | This study   |
| pGB186 | <i>suhB</i> (A1C, T2A) +200nt upstream transcriptional fusion to <i>lacZ</i>                          | This study   |
| pGB187 | <i>suhB</i> ( <i>boxA</i> (C4T/T6C)) (A1C, T2A) +200nt upstream transcriptional fusion to <i>lacZ</i> | This study   |
| pGB193 | <i>suhB</i> (A1C, T2A) (-200→+57nt) transcriptional fusion to <i>lacZ</i>                             | This study   |
| pGB192 | <i>suhB</i> ( <i>boxA</i> (C4T/T6C)) (A1C, T2A) (-200→+57nt) transcriptional fusion to <i>lacZ</i>    | This study   |

**Supplementary Table 4. List of oligonucleotides used in this study.**

| Name   | Sequence                                                      | Description                                                    |
|--------|---------------------------------------------------------------|----------------------------------------------------------------|
| JW125  | AAGCGAAAATCGGCAATA                                            | qPCR: <i>bglB</i> fwd                                          |
| JW126  | CATGGCCTGCAACATATC                                            | qPCR: <i>bglB</i> rev                                          |
| JW595  | GGGCCAGTGTATGGTAAA                                            | qPCR: <i>thyA</i> mid fwd                                      |
| JW663  | TATACTCTGCGCCGTTTT                                            | qPCR: <i>suhB</i> 5' end fwd                                   |
| JW664  | CCGGGGTTTCATAGTTTT                                            | qPCR: <i>suhB</i> 5' end rev                                   |
| JW665  | CCGTTCAAAGCAAAACAG                                            | qPCR: <i>suhB</i> (+472→611) fwd                               |
| JW666  | AAGAAACCGTCAACACGA                                            | qPCR: <i>suhB</i> (+472→611) rev                               |
| JW1495 | ACCCGTTTCGATGTTGTTA                                           | qPCR: <i>sbcC</i> (14028S) fwd                                 |
| JW1496 | TCTGCCCCGTAATCTCAG                                            | qPCR: <i>sbcC</i> (14028S) rev                                 |
| JW3415 | GGACGGATCCTCGAGCATGCTAGACAGCTGCATGCATCTTTG                    | Cloning: pHigh fwd into pAMD-BA-lacZ fwd                       |
| JW3605 | GGACGGATCCTCGAGCATGCTTGTTCATGGCACGGG                          | Cloning: <i>suhB</i> + 200nt ups. fwd                          |
| JW3607 | TTCATGCATTGCTAGCCGCCTGAGTCATTAACGC                            | Cloning: <i>suhB</i> transcriptional fusion to <i>lacZ</i> rev |
| JW6036 | GGCCAGTGCCAAGCTTGCACGCTTCAGAGCGTTCGC                          | Cloning: <i>suhB</i> translational fusion to <i>lacZ</i> rev   |
| JW6038 | TCACTGGATGTTAAATAACGGGAAAACGGC                                | Cloning: <i>boxA</i> (C4A) mutation rev                        |
| JW6039 | TTTAACATCCAGTGAGAGAGACCG                                      | Cloning: <i>boxA</i> (C4A) mutation fwd                        |
| JW6505 | CAGATGCCGATCTCGCTGCTATACTCTGCGCCGTTTTCCCCTTTAGACAGCTGCATGCAT  | FRUIT: TU <i>suhB/boxA E. coli</i>                             |
| JW6506 | TGTTTCAGCATCGGATGCATCGGTCTCTCTCACTGGATGTTAAAGGTGTAGGCTGGAGCTG | FRUIT: TD <i>suhB/boxA E. coli</i>                             |
| JW6596 | AACATCCGAAGTGAGAGAGACCGATG                                    | Cloning: 2nt insert between <i>boxA</i> and S-D fwd            |
| JW6597 | TCTCTCTCACTTCGGATGTTAAAGAACGGG                                | Cloning: 2nt insert between <i>boxA</i> and S-D rev            |
| JW6598 | TAACATCCGAACAGTGAGAGAGACCGATGC                                | Cloning: 4nt insert between <i>boxA</i> and S-D fwd            |
| JW6599 | TCTCTCTCACTGTTTCGGATGTTAAAGAACGGG                             | Cloning: 4nt insert between <i>boxA</i> and S-D rev            |
| JW6600 | CTTTAACATCCGAACACTACCAGTGAGAGAGACCGATGC                       | Cloning: 8nt insert between <i>boxA</i> and S-D fwd            |
| JW6601 | TCTCTCACTGGTAGTTTCGGATGTTAAAGAACGGG                           | Cloning: 8nt insert between <i>boxA</i> and S-D rev            |
| JW6602 | GAACATCCATCTGGTAGTGAGAGAGACCGATGCATC                          | Cloning: 16nt insert between <i>boxA</i> and S-D fwd           |
| JW6603 | ACCAGATGGGTAGTTTCGGATGTTAAAGAACGGGAAAAC                       | Cloning: 16nt insert between <i>boxA</i> and S-D rev           |
| JW6604 | GAACATCCATCTGGTCGCAGATAGTATGAACAGTGAGAGAGACCGATGCATC          | Cloning: 32nt insert between <i>boxA</i> and S-D fwd           |
| JW6605 | GTTCATACTATCTGCGACCAGATGGGTAGTTTCGGATGTTAAAGAACGGGAAAAC       | Cloning: 32nt insert between <i>boxA</i> and S-D rev           |
| JW7070 | CGTTCCTTAACATCCACGTATTCACCGTGGCATTCC                          | Cloning: 100nt insert after <i>boxA</i> fwd                    |

|        |                                                       |                                                            |
|--------|-------------------------------------------------------|------------------------------------------------------------|
| JW7071 | GAATGCCACGGTGAATACGTGGATGTTAAAGAACGGGAAAACG           | Cloning: 100nt insert after <i>boxA</i> rev                |
| JW7072 | TCGGTCTCTCTCACTCCTCATAAAGTGCCTCGTAG                   | Cloning: 100nt insert before S-D rev                       |
| JW7073 | ACGCACTTTATGAGGAGTGAGAGAGACCGATGCATC                  | Cloning: 100nt insert before S-D fwd                       |
| JW7184 | TCTCTCTCACTTCGGATGTTAAATAACGGG                        | Cloning: 2nt insert between <i>boxA</i> (C4A) and S-D rev  |
| JW7185 | TCTCTCTCACTGTTTCGGATGTTAAATAACGGG                     | Cloning: 4nt insert between <i>boxA</i> (C4A) and S-D rev  |
| JW7186 | ATTTAACATCCGAACACCAGTGAGAGAGACCGATGC                  | Cloning: 8nt insert between <i>boxA</i> (C4A) and S-D fwd  |
| JW7187 | TCTCTCACTGGTAGTTTCGGATGTTAAATAACGGG                   | Cloning: 8nt insert between <i>boxA</i> (C4A) and S-D rev  |
| JW7188 | CATCCGAACACCCAAGTGAGAGAGACCGATGC                      | Cloning: 10nt insert between <i>boxA</i> and S-D fwd       |
| JW7189 | TCACTTGGGTAGTTTCGGATGTTAAAGAACGGGAAAAC                | Cloning: 10nt insert between <i>boxA</i> and S-D rev       |
| JW7190 | TCACTTGGGTAGTTTCGGATGTTAAATAACGGGAAAAC                | Cloning: 10nt insert between <i>boxA</i> (C4A) and S-D rev |
| JW7191 | ACCAGATGGGTAGTTTCGGATGTTAAATAACGGGAAAAC               | Cloning: 16nt insert between <i>boxA</i> (C4A) and S-D rev |
| JW7195 | GTTCACTATCTGCGACCAGATGGGTAGTTTCGGATGTTAAATAACGGGAAAAC | Cloning: 32nt insert between <i>boxA</i> (C4A) and S-D rev |
| JW7196 | TGGCATTCTGATCCACGATTACTAGCGAAGTGAGAGAGACCGATGCATC     | Cloning: 40nt insert between <i>boxA</i> and S-D fwd       |
| JW7197 | TGGATCAGAATGCCACGGTGAATACGTGGATGTTAAAGAACGGGAAAAC     | Cloning: 40nt insert between <i>boxA</i> and SD Rev        |
| JW7198 | TGGATCAGAATGCCACGGTGAATACGTGGATGTTAAATAACGGGAAAAC     | Cloning: 40nt insert between <i>boxA</i> (C4A) and SD rev  |
| JW7199 | CGTTATTTAACATCCACGTATTCACCGTGGCATTTC                  | Cloning: 50-100nt insert after <i>boxA</i> (C4A) Fwd       |
| JW7200 | GAATGCCACGGTGAATACGTGGATGTTAAATAACGGGAAAACG           | Cloning: 50-100nt insert after <i>boxA</i> (C4A) Rev       |
| JW7201 | AGCGATTCCGACTTCAGTGAGAGAGACCGATGCATC                  | Cloning: 50nt insert between <i>boxA</i> and S-D fwd       |
| JW7202 | TCGGTCTCTCTCACTGAAGTCGGAATCGCTAGTAATC                 | Cloning: 50nt insert between <i>boxA</i> and S-D rev       |
| JW7203 | ACTTCATGGAGTCGAAGTGAGAGAGACCGATGCATC                  | Cloning: 60nt insert between <i>boxA</i> and S-D fwd       |
| JW7204 | TCGGTCTCTCTCACTTCGACTCCATGAAGTCGGAATC                 | Cloning: 60nt insert between <i>boxA</i> and S-D rev       |
| JW7205 | GTCGAGTTGCAGACTAGTGAGAGAGACCGATGCATC                  | Cloning: 70nt insert between <i>boxA</i> and S-D fwd       |
| JW7206 | TCGGTCTCTCTCACTAGTCTGCAACTCGACTCCATG                  | Cloning: 70nt insert between <i>boxA</i> and S-D rev       |
| JW7207 | AGACTCCAATCCGGAAGTGAGAGAGACCGATGCATC                  | Cloning: 80nt insert between <i>boxA</i> and S-D fwd       |
| JW7208 | TCGGTCTCTCTCACTTCGGATTGGAGTCTGCAAC                    | Cloning: 80nt insert between <i>boxA</i> and S-D rev       |
| JW7209 | CCGACTACGACGCAAGTGAGAGAGACCGATGCATC                   | Cloning: 90nt insert between <i>boxA</i> and S-D fwd       |
| JW7210 | TCGGTCTCTCTCACTTGCCTCGTAGTCCGGATTG                    | Cloning: 90nt insert between <i>boxA</i> and S-D rev       |
| JW7674 | GCCGTTTTCCCGTTTTCTAACATCCAGTGAGA                      | Cloning: MU <i>suhB/boxA</i> (C4T/T6C)                     |
| JW7675 | TCTCACTGGATGTTAGAAAACGGGAAAACGGC                      | Cloning: MD <i>suhB/boxA</i> (C4T/T6C)                     |
| JW7793 | GGCGTTACTGGTGTTATTTTC                                 | qPCR: <i>ynbB</i> fwd                                      |
| JW7794 | CAGACCTTCCAATGTTTTTTC                                 | qPCR: <i>ynbB</i> rev                                      |
| JW7848 | TCATAACTACATGCTGACCG                                  | qPCR: <i>suhB</i> 3' (+699→+798) fwd                       |
| JW7849 | CTTCAGAGCGTCGCTTAAC                                   | qPCR: <i>suhB</i> 3' (+699→+798) rev                       |
| JW7907 | CTTACCCACAGCACACCATC                                  | qPCR: <i>suhB</i> (+172→+273) fwd                          |

|        |                                                                |                                                                     |
|--------|----------------------------------------------------------------|---------------------------------------------------------------------|
| JW7908 | GTTGGTAGTGCCATCCAGTG                                           | qPCR: <i>suhB</i> (+172→+273) rev                                   |
| JW7926 | CCGCACTTCGCGGTATCTAT                                           | qPCR: <i>suhB</i> (+289→+416) fwd                                   |
| JW7927 | CGGTAGCCGTTTACAGCTGTG                                          | qPCR: <i>suhB</i> (+289→+416) rev                                   |
| JW7934 | TAGAAGCGAGCCAGAAAGGC                                           | qPCR: <i>suhB</i> (+85→+192) fwd                                    |
| JW7935 | GATGGTGTGCTGTGGGTAAGA                                          | qPCR: <i>suhB</i> (+85→+192) rev                                    |
| JW8021 | GGACGGATCCTCGAGCATGCTAATACGACTCACTATAGTTTTCCCGTTCTTTAACATC     | Cloning: pT7- <i>suhB</i> fwd                                       |
| JW8022 | GGACGGATCCTCGAGCATGCTAATACGACTCACTATAGTTTTCCCGTTATTTAACATC     | Cloning: pT7- <i>boxA</i> (C4A)- <i>suhB</i> fwd                    |
| JW8284 | AGGATCCCCGGGTACCTTACGCGAACGCGAAGTC                             | Cloning: T7RNAP into pBAD18 rev                                     |
| JW8320 | TTCATGCATTGCTAGC                                               | Cloning: <i>CKO_00699</i> (R82A) transcript. <i>lacZ</i> fusion rev |
| JW8325 | CAAATTGTAAAtAGCACACCCTAC                                       | Cloning: <i>CKO_00699</i> (R82A) <i>boxA</i> (C4A) rev              |
| JW8326 | GCTaTTTAACAATTTGTTTTACAGGGGATG                                 | Cloning: <i>CKO_00699</i> (R82A) <i>boxA</i> (C4A) fwd              |
| JW8340 | GTTTTTTTTGGGCTAGCGAAGGAGATATACATATGAACACGATTAACATCGCTAAG       | Cloning: T7RNAP into pBAD18 fwd                                     |
| JW8355 | GCGCGATACAGACCGGTTTACAGACAGGATAAAGAGGAACGCAGATAGACAGCTGCATGCAT | FRUIT: <i>thyA</i> → +1 of <i>hisG</i> 14028S fwd                   |
| JW8356 | CGGCCTGATTTCTGAATAGCTATGCGTAAGCGGGTGTGTCTAAGTGTAGGCTGGAGCTG    | FRUIT: <i>thyA</i> → +3 of <i>hisG</i> 14028S rev                   |
| JW8357 | AATCGGCATGTTTTCCGCCATCGCAATCAGGCGCTGAGTGTGTAGTGTAGGCTGGAGCTG   | FRUIT: <i>thyA</i> → +100 of <i>hisG</i> 14028S rev                 |
| JW8371 | CCCGTTCTTTAACATCCAGT                                           | qPCR: <i>suhB</i> (-31→+79) fwd                                     |
| JW8372 | CCGGAGTTTCATAGTTTTTGG                                          | qPCR: <i>suhB</i> (-31→+79) rev                                     |
| JW8375 | CTTTGAAATTGGCCTTCGTC                                           | qPCR: <i>suhB</i> (+609→720) fwd                                    |
| JW8376 | ACCGGTCATCATGTAGTTATG                                          | qPCR: <i>suhB</i> (+609→720) rev                                    |
| JW8377 | GATGATGACATTCCGGGTC                                            | qPCR: <i>hisG</i> (+163→+286) fwd                                   |
| JW8378 | GGGTAAATAGCGTGGATCT                                            | qPCR: <i>hisG</i> (+163→+286) rev                                   |
| JW8385 | AATCCGGGTCGTTTTTCAG                                            | qPCR: <i>thyA</i> mid rev                                           |
| JW8383 | AAAGGCCGACAATTCTGC                                             | qPCR: <i>hisG</i> (+746→+853) fwd                                   |
| JW8384 | CAAGCGCTTTCAGTTTCTC                                            | qPCR: <i>hisG</i> (+746→+853) rev                                   |
| JW8405 | AAGTCGAAGTTATCTACCGC                                           | qPCR: <i>hisG</i> (+551→+665) fwd                                   |
| JW8406 | TGAATCACGCCCTGAATAC                                            | qPCR: <i>hisG</i> (+551→+665) rev                                   |
| JW8407 | GTCTGTAAATGGTTCTGTCTG                                          | qPCR: <i>hisG</i> (+446→+570) fwd                                   |
| JW8408 | GCGGTAGATAACTTCGACTT                                           | qPCR: <i>hisG</i> (+446→+570) rev                                   |
| JW8688 | TTCATGCATTGCTAGCttaAATTAAATTACCCGCCTTGC                        | Cloning: <i>suhB</i> (←+57nt) rev                                   |
| JW8817 | AGAGACCGCAGCATCCGATGCTGAACATC                                  | Cloning: <i>suhB</i> (A1C, T2A) mutation fwd                        |
| JW8818 | GATGCTGCGGTCTCTCTCACTGGATG                                     | Cloning: <i>suhB</i> (A1C, T2A) mutation rev                        |

## Supplementary References

1. Carlomagno, M. S. & Nappo, A. The antiterminator NusB enhances termination at a sub-optimal Rho site. *J Mol Biol* **309**, 19–28 (2001).
2. Carlomagno, M. S. & Nappo, A. NusA modulates intragenic termination by different pathways. *Gene* **308**, 115–28 (2003).
3. Berg, K. L., Squires, C. L. & Squires, C. Ribosomal RNA operon anti-termination. Function of leader and spacer region box B-box A sequences and their conservation in diverse micro-organisms. *J Mol Biol* **209**, 345–358 (1989).
4. Nodwell, J. R. & Greenblatt, J. Recognition of boxA antiterminator RNA by the E. coli antitermination factors NusB and ribosomal protein S10. *Cell* **72**, 261–268 (1993).
5. Blattner, F. R. *et al.* The complete genome sequence of Escherichia coli K-12. *Science* **277**, 1453–1462 (1997).
6. Stringer, A. M. *et al.* Genome-Scale Analyses of Escherichia coli and Salmonella enterica AraC Reveal Non-Canonical Targets and an Expanded Core Regulon. *J Bacteriol* **196**, 660–671 (2014).
7. Singh, N. *et al.* SuhB Associates with Nus Factors To Facilitate 30S Ribosome Biogenesis in Escherichia coli. *mBio* **7**, e00114-16 (2016).
8. Datsenko, K. A. & Wanner, B. L. One-step inactivation of chromosomal genes in Escherichia coli K-12 using PCR products. *Proc Natl Acad Sci USA* **97**, 6640–6645 (2000).
9. Guzman, L. M., Belin, D., Carson, M. J. & Beckwith, J. Tight regulation, modulation, and high-level expression by vectors containing the arabinose PBAD promoter. *J. Bacteriol.* **177**, 4121–4130 (1995).
