# Supplementary material for: Identification of regulatory targets for the bacterial Nus factor complex
Source: PubMed Central journal article supplement (PMC5725501; doi:10.1038/s41467-017-02124-9), 2017-12-11
Supplement: 41467_2017_2124_MOESM3_ESM.pdf [file 41467_2017_2124_MOESM3_ESM.pdf]

## **Description of Additional Supplementary Files**

File Name: Supplementary Data 1

Description: List of all annotated genes in  $\gamma$ -proteobacteria with a putative boxA sequence  $\leq 50$  bp upstream.
